# Supplementary material for: B31− and B32−: chiral quasi-planar boron clusters
Source: Royal Society of Chemistry journal article supplement (doi:10.1039/c9nr01524h), 2019-01-01
Supplement: c9nr01524h1.pdf [file c9nr01524h1.pdf]

## Supplementary Information

### $B_{31}^-$ and $B_{32}^-$ : Chiral Quasi-Planar Boron Clusters†

Qiang Chen,<sup>‡a</sup> Teng-Teng Chen,<sup>‡b</sup> Hai-Ru Li,<sup>a</sup> Xiao-Yun Zhao,<sup>a</sup> Wei-Jia Chen,<sup>b</sup> Hua-Jin Zhai,<sup>\*a</sup> Si-Dian Li<sup>\*a</sup> and Lai-Sheng Wang<sup>\*b</sup>

<sup>a</sup> Nanocluster Laboratory, Institute of Molecular Science, Shanxi University, Taiyuan 030006, China

<sup>b</sup> Department of Chemistry, Brown University, Providence, Rhode Island 02912, USA.

E-mail: hj.zhai@sxu.edu.cn (H.J.Z.); lisidian@sxu.edu.cn (S.D.L.); lai-sheng\_wang@brown.edu (L.S.W.)

**Table S1.** Comparison of the experimental VDEs of  $B_{31}^-$  and the calculated VDEs for the low-lying isomers of  $B_{31}^-$ .

**Table S2.** Comparison of the experimental VDEs of  $B_{32}^-$  and the calculated VDEs for the low-lying isomers of  $B_{32}^-$ .

**Figure S1.** Low-lying isomers of  $B_{31}^-$  at CCSD(T)/6-311G(d)//PBE0/6-311+G(d) and PBE0/6-311+G(d) levels of theory.

**Figure S2.** Low-lying isomers of  $B_{32}^-$  at UCCSD(T)/6-31G(d)//PBE0/6-311+G(d) and PBE0/6-311+G(d) levels of theory.

**Figure S3.** Comparison of the experimental PES spectrum of  $B_{31}^-$  and the simulated spectra for some low-lying isomers of  $B_{31}^-$ .

**Figure S4.** The AdNDP bonding patterns for the closed-shell  $C_2 B_{32}^{2-}$ .

**Figure S5** Calculated IRC reaction path of  $B_{31}^-$  at PBE0/6-311+G(d) level.

**Figure S6** Calculated IRC reaction path of  $B_{32}^-$  at PBE0/6-311+G(d) level.

**Table S3.** Optimized cartesian coordinates of the key structures of  $B_{31}^-$  and  $B_{32}^-$ .

**Table S1.** Experimental vertical detachment energies (VDEs) of  $B_{31}^-$ , compared to the calculated values of the low-lying isomers of  $B_{31}^-$  at the TD-PBE0/6-311+G(d) level. All energies are in eV.

| Feature                                | VDE (expt.) | Final state and electronic configuration                                                                                                                                                       | VDE (theo.)<br>TD-PBE0 |
|----------------------------------------|-------------|------------------------------------------------------------------------------------------------------------------------------------------------------------------------------------------------|------------------------|
| $B_{31}^-$ Isomer I/II ( $C_1$ $^1A$ ) |             |                                                                                                                                                                                                |                        |
| X                                      | 4.07        | $^2A$ {... 39a <sup>2</sup> 40a <sup>2</sup> 41a <sup>2</sup> 42a <sup>2</sup> 43a <sup>2</sup> 44a <sup>2</sup> 45a <sup>2</sup> 46a <sup>2</sup> <b>47a<sup>1</sup></b> }                    | 3.89                   |
| A                                      | 4.24        | $^2A$ {... 39a <sup>2</sup> 40a <sup>2</sup> 41a <sup>2</sup> 42a <sup>2</sup> 43a <sup>2</sup> 44a <sup>2</sup> 45a <sup>2</sup> <b>46a<sup>1</sup></b> 47a <sup>2</sup> }                    | 4.07                   |
| B                                      | 4.60        | $^2A$ {... 39a <sup>2</sup> 40a <sup>2</sup> 41a <sup>2</sup> 42a <sup>2</sup> 43a <sup>2</sup> 44a <sup>2</sup> <b>45a<sup>1</sup></b> 46a <sup>2</sup> 47a <sup>2</sup> }                    | 4.49                   |
| C                                      | 5.11        | $^2A$ {... 39a <sup>2</sup> 40a <sup>2</sup> 41a <sup>2</sup> 42a <sup>2</sup> 43a <sup>2</sup> <b>44a<sup>1</sup></b> 45a <sup>2</sup> 46a <sup>2</sup> 47a <sup>2</sup> }                    | 5.09                   |
| D                                      | 5.30        | $^2A$ {... 39a <sup>2</sup> 40a <sup>2</sup> 41a <sup>2</sup> 42a <sup>2</sup> <b>43a<sup>1</sup></b> 44a <sup>2</sup> 45a <sup>2</sup> 46a <sup>2</sup> 47a <sup>2</sup> }                    | 5.22                   |
| E                                      | ~5.7        | $^2A$ {... 39a <sup>2</sup> 40a <sup>2</sup> 41a <sup>2</sup> <b>42a<sup>1</sup></b> 43a <sup>2</sup> 44a <sup>2</sup> 45a <sup>2</sup> 46a <sup>2</sup> 47a <sup>2</sup> }                    | 5.54                   |
| F                                      | 6.00        | $^2A$ {... 39a <sup>2</sup> 40a <sup>2</sup> <b>41a<sup>1</sup></b> 42a <sup>2</sup> 43a <sup>2</sup> 44a <sup>2</sup> 45a <sup>2</sup> 46a <sup>2</sup> 47a <sup>2</sup> }                    | 5.92                   |
| G                                      | ~6.2        | $^2A$ {... 39a <sup>2</sup> <b>40a<sup>1</sup></b> 41a <sup>2</sup> 42a <sup>2</sup> 43a <sup>2</sup> 44a <sup>2</sup> 45a <sup>2</sup> 46a <sup>2</sup> 47a <sup>2</sup> }                    | 6.19                   |
|                                        |             | $^2A$ {... <b>39a<sup>1</sup></b> 40a <sup>2</sup> 41a <sup>2</sup> 42a <sup>2</sup> 43a <sup>2</sup> 44a <sup>2</sup> 45a <sup>2</sup> 46a <sup>2</sup> 47a <sup>2</sup> }                    | 6.40                   |
| $B_{31}^-$ Isomer III ( $C_2$ $^1A$ )  |             |                                                                                                                                                                                                |                        |
|                                        |             | $^2B$ {... 19b <sup>2</sup> 20a <sup>2</sup> 21a <sup>2</sup> 20b <sup>2</sup> 22a <sup>2</sup> 23a <sup>2</sup> 21b <sup>2</sup> 22b <sup>2</sup> 24a <sup>2</sup> <b>23b<sup>1</sup></b> }   | 4.07                   |
|                                        |             | $^2B$ {... 19b <sup>2</sup> 20a <sup>2</sup> 21a <sup>2</sup> 20b <sup>2</sup> 22a <sup>2</sup> 23a <sup>2</sup> 21b <sup>2</sup> 22b <sup>2</sup> <b>24a<sup>1</sup></b> 23b <sup>2</sup> }   | 4.37                   |
|                                        |             | $^2A$ {... 19b <sup>2</sup> 20a <sup>2</sup> 21a <sup>2</sup> 20b <sup>2</sup> 22a <sup>2</sup> 23a <sup>2</sup> 21b <sup>2</sup> <b>22b<sup>1</sup></b> 24a <sup>2</sup> 23b <sup>2</sup> }   | 4.53                   |
|                                        |             | $^2A$ {... 19b <sup>2</sup> 20a <sup>2</sup> 21a <sup>2</sup> 20b <sup>2</sup> 22a <sup>2</sup> 23a <sup>2</sup> <b>21b<sup>1</sup></b> 22b <sup>2</sup> 24a <sup>2</sup> 23b <sup>2</sup> }   | 4.93                   |
|                                        |             | $^2B$ {... 19b <sup>2</sup> 20a <sup>2</sup> 21a <sup>2</sup> 20b <sup>2</sup> 22a <sup>2</sup> <b>23a<sup>1</sup></b> 21b <sup>2</sup> 22b <sup>2</sup> 24a <sup>2</sup> 23b <sup>2</sup> }   | 4.94                   |
|                                        |             | $^2B$ {... 19b <sup>2</sup> 20a <sup>2</sup> 21a <sup>2</sup> 20b <sup>2</sup> <b>22a<sup>1</sup></b> 23a <sup>2</sup> 21b <sup>2</sup> 22b <sup>2</sup> 24a <sup>2</sup> 23b <sup>2</sup> }   | 5.06                   |
|                                        |             | $^2A$ {... 19b <sup>2</sup> 20a <sup>2</sup> 21a <sup>2</sup> <b>20b<sup>1</sup></b> 22a <sup>2</sup> 23a <sup>2</sup> 21b <sup>2</sup> 22b <sup>2</sup> 24a <sup>2</sup> 23b <sup>2</sup> }   | 5.18                   |
|                                        |             | $^2B$ {... 19b <sup>2</sup> 20a <sup>2</sup> <b>21a<sup>1</sup></b> 20b <sup>2</sup> 22a <sup>2</sup> 23a <sup>2</sup> 21b <sup>2</sup> 22b <sup>2</sup> 24a <sup>2</sup> 23b <sup>2</sup> }   | 5.49                   |
|                                        |             | $^2B$ {... 19b <sup>2</sup> <b>20a<sup>1</sup></b> 21a <sup>2</sup> 20b <sup>2</sup> 22a <sup>2</sup> 23a <sup>2</sup> 21b <sup>2</sup> 22b <sup>2</sup> 24a <sup>2</sup> 23b <sup>2</sup> }   | 5.96                   |
|                                        |             | $^2A$ {... <b>19b<sup>1</sup></b> 20a <sup>2</sup> 21a <sup>2</sup> 20b <sup>2</sup> 22a <sup>2</sup> 23a <sup>2</sup> 21b <sup>2</sup> 22b <sup>2</sup> 24a <sup>2</sup> 23b <sup>2</sup> }   | 6.37                   |
| $B_{31}^-$ Isomer IV ( $C_s$ $^1A$ )   |             |                                                                                                                                                                                                |                        |
|                                        |             | $^2A'$ {... 17a <sup>2</sup> 22a <sup>2</sup> 23a <sup>2</sup> 18a <sup>2</sup> 19a <sup>2</sup> 24a <sup>2</sup> 20a <sup>2</sup> 21a <sup>2</sup> 25a <sup>2</sup> <b>26a<sup>1</sup></b> }  | 3.88                   |
|                                        |             | $^2A'$ {... 17a <sup>2</sup> 22a <sup>2</sup> 23a <sup>2</sup> 18a <sup>2</sup> 19a <sup>2</sup> 24a <sup>2</sup> 20a <sup>2</sup> 21a <sup>2</sup> <b>25a<sup>1</sup></b> 26a <sup>2</sup> }  | 4.62                   |
|                                        |             | $^2A''$ {... 17a <sup>2</sup> 22a <sup>2</sup> 23a <sup>2</sup> 18a <sup>2</sup> 19a <sup>2</sup> 24a <sup>2</sup> 20a <sup>2</sup> <b>21a<sup>1</sup></b> 25a <sup>2</sup> 26a <sup>2</sup> } | 4.88                   |
|                                        |             | $^2A''$ {... 17a <sup>2</sup> 22a <sup>2</sup> 23a <sup>2</sup> 18a <sup>2</sup> 19a <sup>2</sup> 24a <sup>2</sup> <b>20a<sup>1</sup></b> 21a <sup>2</sup> 25a <sup>2</sup> 26a <sup>2</sup> } | 5.16                   |
|                                        |             | $^2A'$ {... 17a <sup>2</sup> 22a <sup>2</sup> 23a <sup>2</sup> 18a <sup>2</sup> 19a <sup>2</sup> <b>24a<sup>1</sup></b> 20a <sup>2</sup> 21a <sup>2</sup> 25a <sup>2</sup> 26a <sup>2</sup> }  | 5.32                   |
|                                        |             | $^2A''$ {... 17a <sup>2</sup> 22a <sup>2</sup> 23a <sup>2</sup> 18a <sup>2</sup> <b>19a<sup>1</sup></b> 24a <sup>2</sup> 20a <sup>2</sup> 21a <sup>2</sup> 25a <sup>2</sup> 26a <sup>2</sup> } | 5.50                   |
|                                        |             | $^2A''$ {... 17a <sup>2</sup> 22a <sup>2</sup> 23a <sup>2</sup> <b>18a<sup>1</sup></b> 19a <sup>2</sup> 24a <sup>2</sup> 20a <sup>2</sup> 21a <sup>2</sup> 25a <sup>2</sup> 26a <sup>2</sup> } | 5.56                   |
|                                        |             | $^2A'$ {... 17a <sup>2</sup> 22a <sup>2</sup> <b>23a<sup>1</sup></b> 18a <sup>2</sup> 19a <sup>2</sup> 24a <sup>2</sup> 20a <sup>2</sup> 21a <sup>2</sup> 25a <sup>2</sup> 26a <sup>2</sup> }  | 5.60                   |
|                                        |             | $^2A''$ {... <b>17a<sup>1</sup></b> 22a <sup>2</sup> 23a <sup>2</sup> 18a <sup>2</sup> 19a <sup>2</sup> 24a <sup>2</sup> 20a <sup>2</sup> 21a <sup>2</sup> 25a <sup>2</sup> 26a <sup>2</sup> } | 6.37                   |
| $B_{31}^-$ Isomer V ( $C_1$ $^1A$ )    |             |                                                                                                                                                                                                |                        |
|                                        |             | $^2A$ {... 39a <sup>2</sup> 40a <sup>2</sup> 41a <sup>2</sup> 42a <sup>2</sup> 43a <sup>2</sup> 44a <sup>2</sup> 45a <sup>2</sup> 46a <sup>2</sup> <b>47a<sup>1</sup></b> }                    | 3.88                   |
|                                        |             | $^2A$ {... 39a <sup>2</sup> 40a <sup>2</sup> 41a <sup>2</sup> 42a <sup>2</sup> 43a <sup>2</sup> 44a <sup>2</sup> 45a <sup>2</sup> <b>46a<sup>1</sup></b> 47a <sup>2</sup> }                    | 4.47                   |
|                                        |             | $^2A$ {... 39a <sup>2</sup> 40a <sup>2</sup> 41a <sup>2</sup> 42a <sup>2</sup> 43a <sup>2</sup> 44a <sup>2</sup> <b>45a<sup>1</sup></b> 46a <sup>2</sup> 47a <sup>2</sup> }                    | 4.65                   |
|                                        |             | $^2A$ {... 39a <sup>2</sup> 40a <sup>2</sup> 41a <sup>2</sup> 42a <sup>2</sup> 43a <sup>2</sup> <b>44a<sup>1</sup></b> 45a <sup>2</sup> 46a <sup>2</sup> 47a <sup>2</sup> }                    | 4.92                   |
|                                        |             | $^2A$ {... 39a <sup>2</sup> 40a <sup>2</sup> 41a <sup>2</sup> 42a <sup>2</sup> <b>43a<sup>1</sup></b> 44a <sup>2</sup> 45a <sup>2</sup> 46a <sup>2</sup> 47a <sup>2</sup> }                    | 5.04                   |
|                                        |             | $^2A$ {... 39a <sup>2</sup> 40a <sup>2</sup> 41a <sup>2</sup> <b>42a<sup>1</sup></b> 43a <sup>2</sup> 44a <sup>2</sup> 45a <sup>2</sup> 46a <sup>2</sup> 47a <sup>2</sup> }                    | 5.30                   |
|                                        |             | $^2A$ {... 39a <sup>2</sup> 40a <sup>2</sup> <b>41a<sup>1</sup></b> 42a <sup>2</sup> 43a <sup>2</sup> 44a <sup>2</sup> 45a <sup>2</sup> 46a <sup>2</sup> 47a <sup>2</sup> }                    | 5.70                   |
|                                        |             | $^2A$ {... 39a <sup>2</sup> <b>40a<sup>1</sup></b> 41a <sup>2</sup> 42a <sup>2</sup> 43a <sup>2</sup> 44a <sup>2</sup> 45a <sup>2</sup> 46a <sup>2</sup> 47a <sup>2</sup> }                    | 5.98                   |
|                                        |             | $^2A$ {... <b>39a<sup>1</sup></b> 40a <sup>2</sup> 41a <sup>2</sup> 42a <sup>2</sup> 43a <sup>2</sup> 44a <sup>2</sup> 45a <sup>2</sup> 46a <sup>2</sup> 47a <sup>2</sup> }                    | 6.29                   |

**Table S2.** Experimental vertical detachment energies (VDEs) of  $B_{32}^-$ , compared to the calculated values of the low-lying isomers of  $B_{32}^-$  at the TD-PBE0/6-311+G(d) level. All energies are in eV.

| Feature                               | VDE (expt.) | Final state and electronic configuration                                                                     | VDE (theo.)<br>TD-PBE0 |
|---------------------------------------|-------------|--------------------------------------------------------------------------------------------------------------|------------------------|
| $B_{32}^-$ Isomer VI/VII ( $C_2^2A$ ) |             |                                                                                                              |                        |
| X'                                    | 3.57        |                                                                                                              |                        |
| X                                     | 3.82        | $^1A \{ \dots 21b^2 21a^2 22b^2 22a^2 23a^2 23b^2 24b^2 24a^2 \mathbf{25a}^0 \}$                             | 3.78                   |
| A                                     | 4.30        | $^3A \{ \dots 21b^2 21a^2 22b^2 22a^2 23a^2 23b^2 24b^2 \mathbf{24a}^1 25a^1 \}$                             | 4.12                   |
|                                       |             | $^1A \{ \dots 21b^2 21a^2 22b^2 22a^2 23a^2 23b^2 24b^2 \mathbf{24a}^1 25a^1 \}$                             | 4.38                   |
| B                                     | 5.04        | $^3B \{ \dots 21b^2 21a^2 22b^2 22a^2 23a^2 23b^2 \mathbf{24b}^1 24a^2 25a^1 \}$                             | 4.71                   |
|                                       |             | $^3B \{ \dots 21b^2 21a^2 22b^2 22a^2 23a^2 \mathbf{23b}^1 24b^2 24a^2 25a^1 \}$                             | 4.87                   |
| C                                     | 5.17        | $^3A \{ \dots 21b^2 21a^2 22b^2 22a^2 \mathbf{23a}^1 23b^2 24b^2 24a^2 25a^1 \}$                             | 5.00                   |
|                                       |             | $^1B \{ \dots 21b^2 21a^2 22b^2 22a^2 23a^2 23b^2 \mathbf{24b}^1 24a^2 25a^1 \}$                             | 5.06                   |
|                                       |             | $^1B \{ \dots 21b^2 21a^2 22b^2 22a^2 23a^2 \mathbf{23b}^1 24b^2 24a^2 25a^1 \}$                             | 5.20                   |
|                                       |             | $^1A \{ \dots 21b^2 21a^2 22b^2 22a^2 \mathbf{23a}^1 23b^2 24b^2 24a^2 25a^1 \}$                             | 5.22                   |
| D                                     | 5.80        | $^3A \{ \dots 21b^2 21a^2 22b^2 \mathbf{22a}^1 23a^2 23b^2 24b^2 24a^2 25a^1 \}$                             | 5.48                   |
|                                       |             | $^3B \{ \dots 21b^2 21a^2 \mathbf{22b}^1 22a^2 23a^2 23b^2 24b^2 24a^2 25a^1 \}$                             | 5.58                   |
|                                       |             | $^1A \{ \dots 21b^2 21a^2 22b^2 \mathbf{22a}^1 23a^2 23b^2 24b^2 24a^2 25a^1 \}$                             | 5.80                   |
| E                                     | ~6.10       | $^3B \{ \dots \mathbf{21b}^1 21a^2 22b^2 22a^2 23a^2 23b^2 24b^2 24a^2 25a^1 \}$                             | 5.87                   |
|                                       |             | $^3A \{ \dots 21b^2 \mathbf{21a}^1 22b^2 22a^2 23a^2 23b^2 24b^2 24a^2 25a^1 \}$                             | 5.89                   |
|                                       |             | $^1B \{ \dots \mathbf{21b}^1 21a^2 22b^2 22a^2 23a^2 23b^2 24b^2 24a^2 25a^1 \}$                             | 6.02                   |
|                                       |             | $^1A \{ \dots 21b^2 \mathbf{21a}^1 22b^2 22a^2 23a^2 23b^2 24b^2 24a^2 25a^1 \}$                             | 6.05                   |
| $B_{32}^-$ Isomer VIII ( $C_i^2A_u$ ) |             |                                                                                                              |                        |
| X'                                    | 3.57        |                                                                                                              |                        |
| X                                     | 3.82        | $^1A_g \{ \dots 21a_u^2 21a_g^2 22a_u^2 22a_g^2 23a_u^2 23a_g^2 24a_u^2 24a_g^2 \mathbf{25a_u}^0 \}$         | 3.77                   |
| A                                     | 4.30        | $^3A_g \{ \dots 21a_u^2 21a_g^2 22a_u^2 22a_g^2 23a_u^2 23a_g^2 24a_u^2 24a_g^2 \mathbf{24a_u}^1 25a_u^1 \}$ | 4.10                   |
|                                       |             | $^1A_g \{ \dots 21a_u^2 21a_g^2 22a_u^2 22a_g^2 23a_u^2 23a_g^2 24a_u^2 \mathbf{24a_g}^1 25a_u^1 \}$         | 4.32                   |
| B                                     | 5.04        | $^3A_u \{ \dots 21a_u^2 21a_g^2 22a_u^2 22a_g^2 23a_u^2 23a_g^2 \mathbf{24a_g}^1 24a_u^2 25a_u^1 \}$         | 4.49                   |
|                                       |             | $^1A_u \{ \dots 21a_u^2 21a_g^2 22a_u^2 22a_g^2 23a_u^2 23a_g^2 \mathbf{24a_g}^1 24a_u^2 25a_u^1 \}$         | 4.84                   |
| C                                     | 5.17        | $^3A_g \{ \dots 21a_u^2 21a_g^2 22a_u^2 22a_g^2 23a_u^2 \mathbf{23a_g}^1 24a_g^2 24a_u^2 25a_u^1 \}$         | 5.17                   |
|                                       |             | $^3A_u \{ \dots 21a_u^2 21a_g^2 22a_u^2 22a_g^2 \mathbf{23a_g}^1 23a_u^2 24a_g^2 24a_u^2 25a_u^1 \}$         | 5.32                   |
|                                       |             | $^1A_g \{ \dots 21a_u^2 21a_g^2 22a_u^2 22a_g^2 23a_u^2 \mathbf{23a_g}^1 24a_g^2 24a_u^2 25a_u^1 \}$         | 5.35                   |
|                                       |             | $^3A_u \{ \dots 21a_u^2 21a_g^2 22a_u^2 \mathbf{22a_g}^1 23a_u^2 23a_g^2 24a_g^2 24a_u^2 25a_u^1 \}$         | 5.36                   |
|                                       |             | $^3A_g \{ \dots 21a_u^2 21a_g^2 \mathbf{22a_u}^1 22a_g^2 23a_u^2 23a_g^2 24a_g^2 24a_u^2 25a_u^1 \}$         | 5.42                   |
|                                       |             | $^1A_u \{ \dots 21a_u^2 21a_g^2 22a_u^2 22a_g^2 \mathbf{23a_g}^1 23a_u^2 24a_g^2 24a_u^2 25a_u^1 \}$         | 5.48                   |
| D                                     | 5.80        | $^1A_g \{ \dots 21a_u^2 21a_g^2 \mathbf{22a_u}^1 22a_g^2 23a_u^2 23a_g^2 24a_g^2 24a_u^2 25a_u^1 \}$         | 5.79                   |
|                                       |             | $^3A_g \{ \dots \mathbf{21a_u}^1 21a_g^2 22a_u^2 22a_g^2 23a_u^2 23a_g^2 24a_g^2 24a_u^2 25a_u^1 \}$         | 5.84                   |
|                                       |             | $^3A_u \{ \dots 21a_u^2 \mathbf{21a_g}^1 22a_u^2 22a_g^2 23a_u^2 23a_g^2 24a_g^2 24a_u^2 25a_u^1 \}$         | 5.88                   |
|                                       |             | $^1A_g \{ \dots \mathbf{21a_u}^1 21a_g^2 22a_u^2 22a_g^2 23a_u^2 23a_g^2 24a_g^2 24a_u^2 25a_u^1 \}$         | 6.05                   |
| E                                     | ~6.10       | $^1A_u \{ \dots 21a_u^2 \mathbf{21a_g}^1 22a_u^2 22a_g^2 23a_u^2 23a_g^2 24a_g^2 24a_u^2 25a_u^1 \}$         | 6.14                   |

**Figure S1.** Low-lying isomers of  $B_{31}^-$ . The relative energies are given in eV at CCSD(T)/6-311G(d)//PBE0/6-311+G(d) and PBE0/6-311+G(d) (in square brackets) levels of theory.

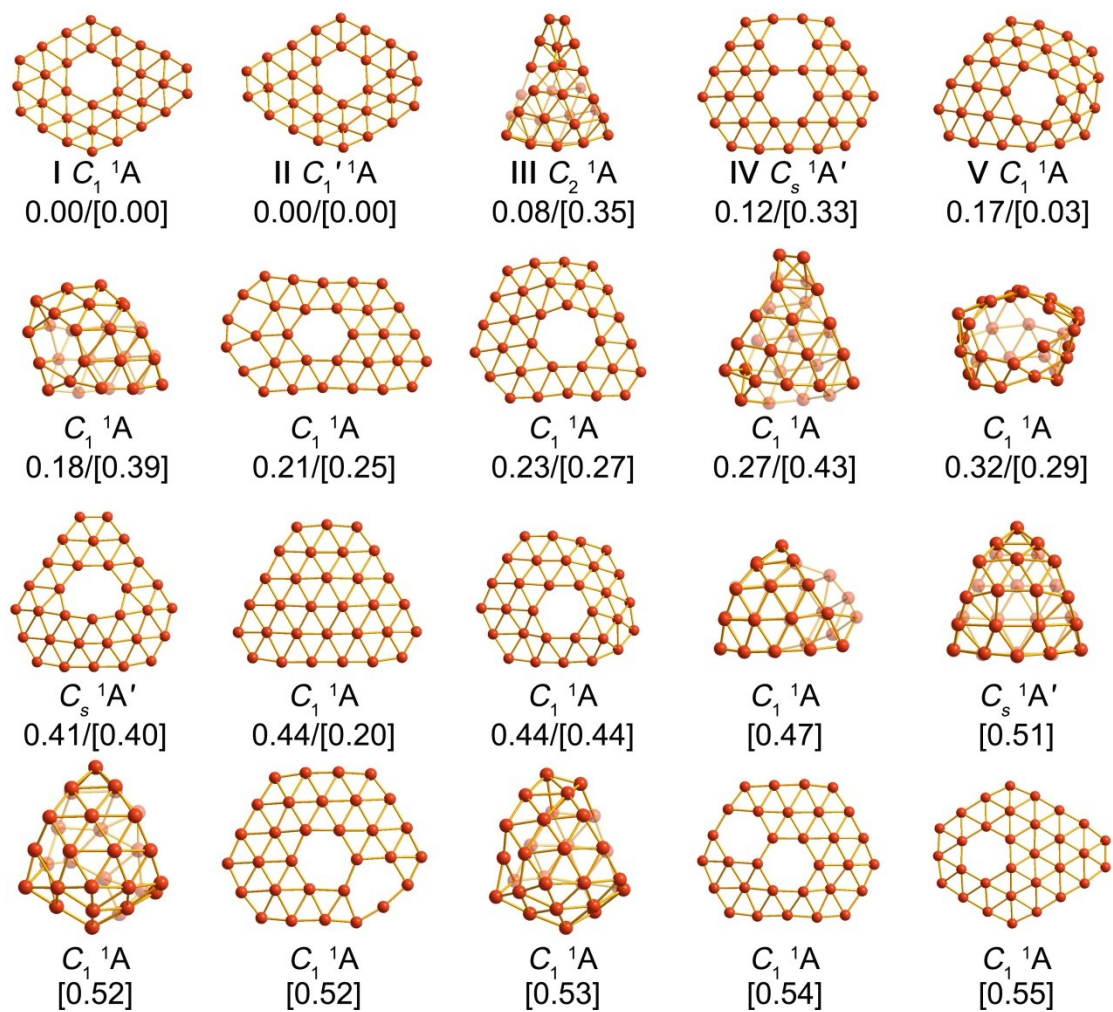

**Figure S2.** Low-lying isomers of  $B_{32}^-$ . The relative energies are given in eV at UCCSD(T)/6-31G(d)/PBE0/6-311+G(d) and PBE0/6-311+G(d) (in square brackets) levels of theory.

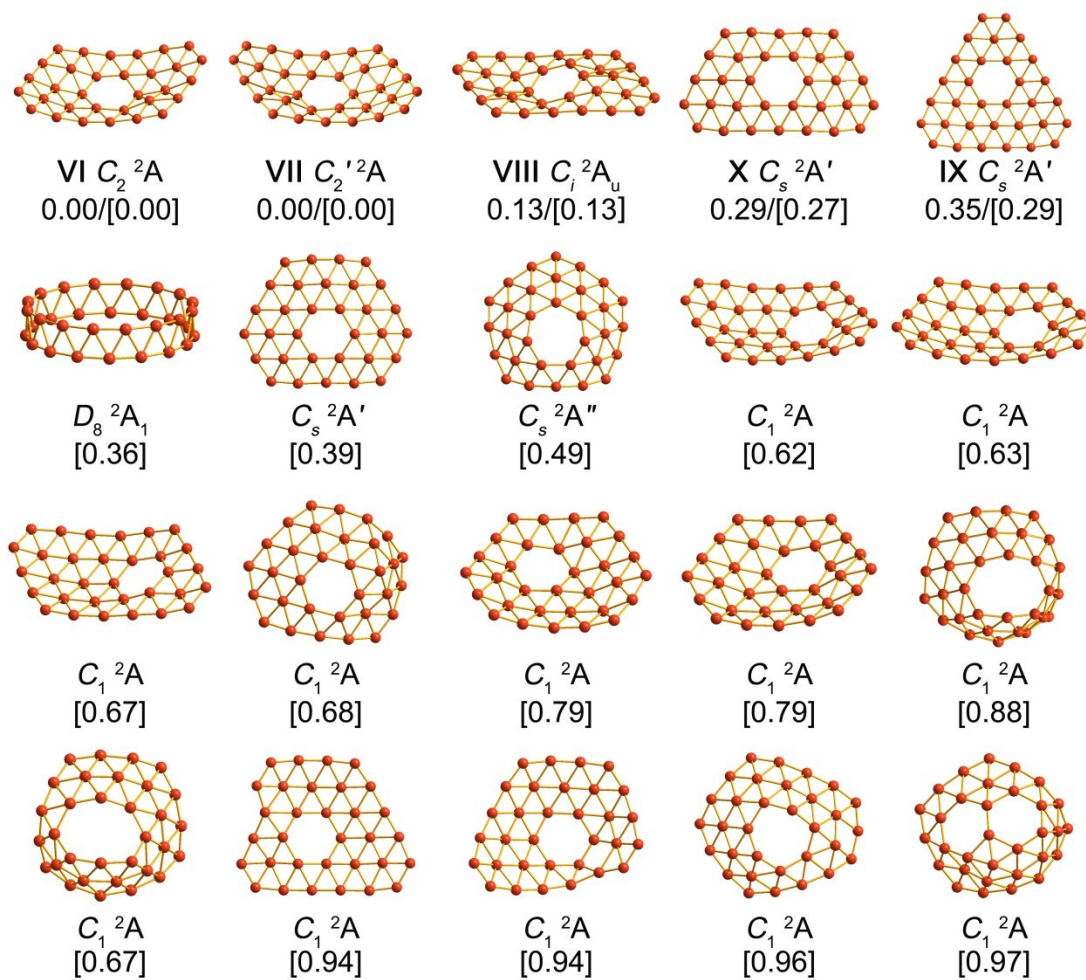

**Figure S3.** The experimental PES spectrum of (a)  $B_{31}^-$  at 193 nm (6.424 eV), compared to (b-d) the simulated spectra of some low-lying isomers of  $B_{31}^-$ .

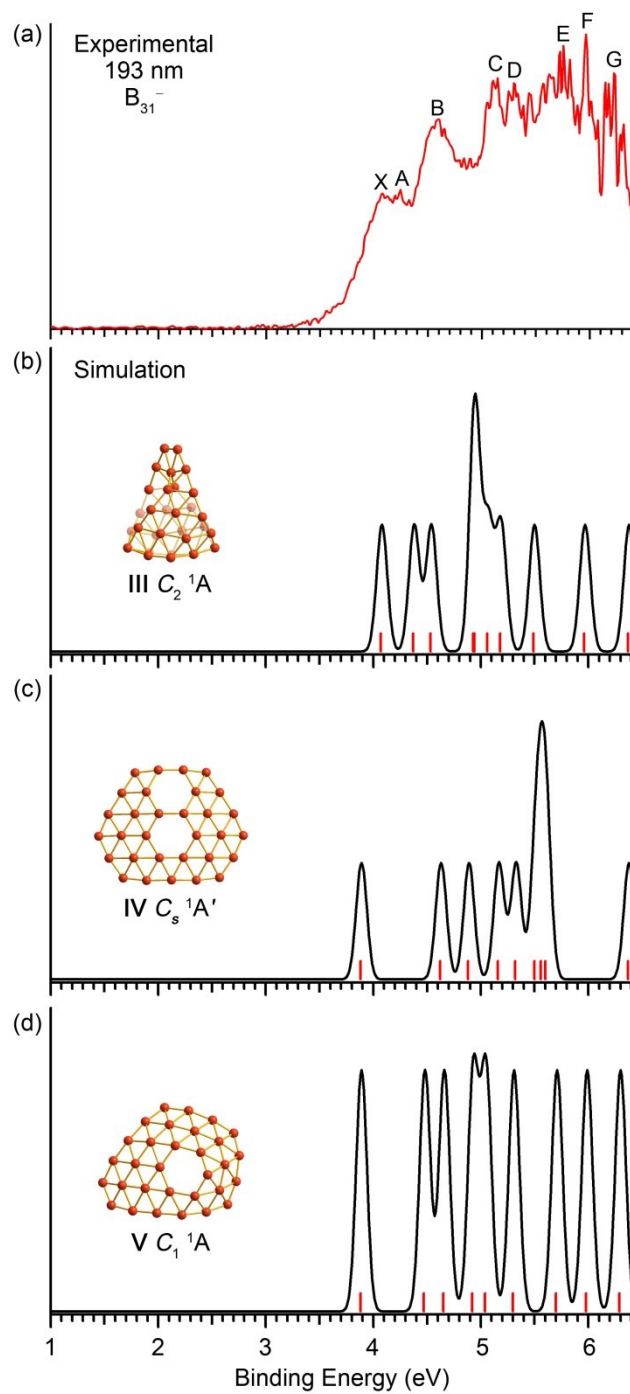

**Figure S4.** The AdNDP bonding patterns for the closed-shell  $C_2 B_{32}^{2-}$ .

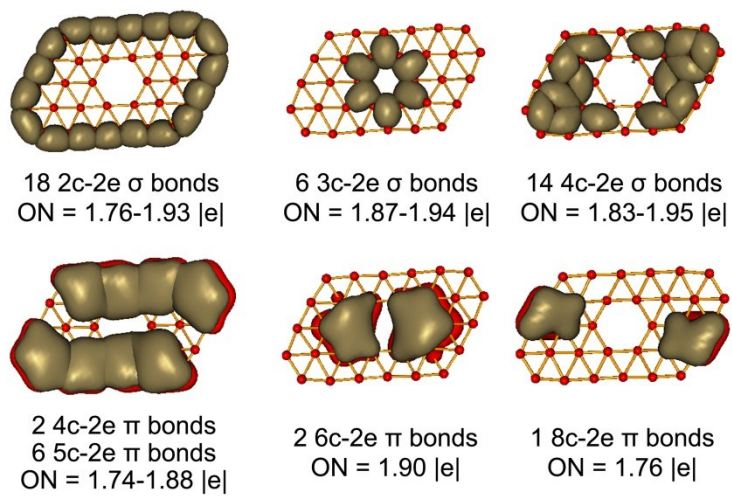

**Figure S5.** Calculated IRC reaction path of  $B_{31}^-$  from the global minimum  $C_1 B_{31}^-$  (I) to its enantiomer  $C_1' B_{31}^-$  (II) via the transition state  $C_1 B_{31}^-$  (TS1) at PBE0/6-311+G(d) level.

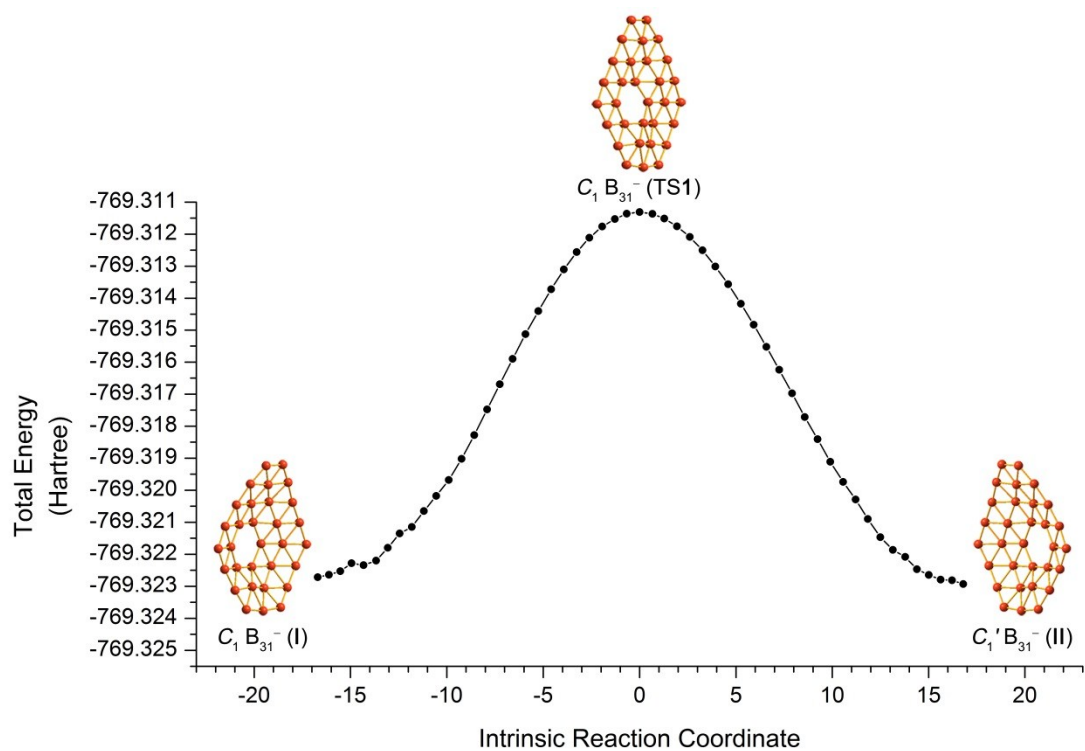



**Figure S6.** Calculated IRC reaction path of  $B_{32}^-$  from global minimum  $C_2 B_{32}^-$  (VI) to intermediate  $C_i B_{32}^-$  (VIII) via the transition state  $C_1 B_{32}^-$  (TS2) at PBE0/6-311+G(d) level.

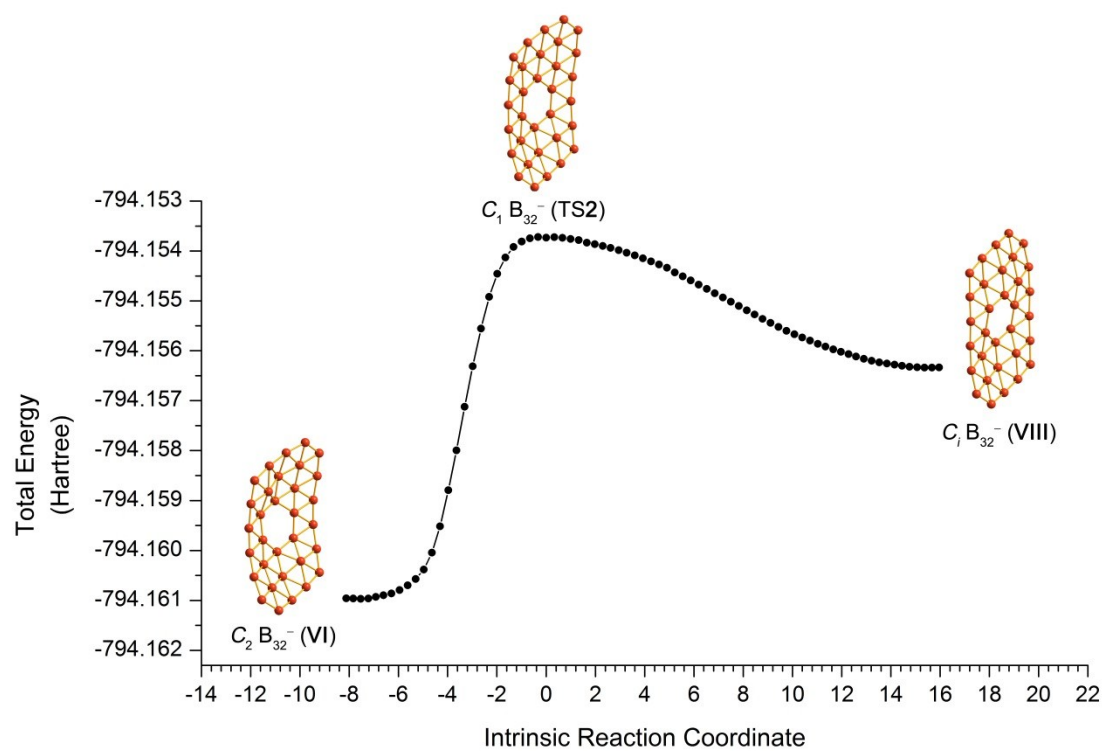

**Table S3.** Optimized coordinates of the key structures of  $B_{31}^-$  and  $B_{32}^-$  at the PBE0/6-311+G(d) level of theory.

| $C_1 B_{31}^- (\mathbf{I})$ |             |             |             | $C_1 B_{31}^- (\mathbf{TS1})$ |             |             |             |
|-----------------------------|-------------|-------------|-------------|-------------------------------|-------------|-------------|-------------|
| B                           | -1.79900600 | 1.66898700  | 0.36543300  | B                             | 1.04538800  | -1.61434800 | 0.22262800  |
| B                           | -0.43947200 | 4.01059600  | -0.43895000 | B                             | 2.46561200  | -0.86212400 | -0.11899200 |
| B                           | -0.40998700 | 2.54933000  | 0.33201800  | B                             | 2.43671600  | 0.87935500  | -0.01812500 |
| B                           | 1.04433700  | 0.02998900  | 0.55457200  | B                             | 1.06957200  | 1.70204600  | -0.09439500 |
| B                           | 2.44635900  | 0.92366300  | 0.38196500  | B                             | -0.33670700 | -0.75470600 | -0.03885300 |
| B                           | -0.35527600 | -0.81701100 | 0.81877700  | B                             | -1.76717000 | 1.70024600  | -0.00070900 |
| B                           | 5.09880900  | 0.84671000  | -0.70047000 | B                             | 1.07988400  | 3.45564300  | -0.14147900 |
| B                           | -4.46330100 | 1.52245500  | -0.48306300 | B                             | 1.06710600  | -3.41830300 | -0.00794100 |
| B                           | 3.88501300  | 0.08662200  | 0.10216400  | B                             | -0.35522700 | 2.53684600  | 0.03764500  |
| B                           | -3.25403900 | 2.45674100  | -0.11672400 | B                             | 2.50355600  | -2.58155900 | 0.12415000  |
| B                           | -1.84014700 | -0.01180500 | 0.72080500  | B                             | 2.50581500  | 2.57023400  | -0.07200800 |
| B                           | 1.04822500  | 1.72779500  | 0.40943200  | B                             | -0.37368000 | 4.15888400  | -0.16528700 |
| B                           | 2.41416500  | 2.55682600  | -0.11511700 | B                             | -1.78774500 | 3.41685200  | -0.02319800 |
| B                           | 3.87673600  | 1.79592300  | -0.32440800 | B                             | -3.10977900 | 0.86220200  | 0.45642300  |
| B                           | 5.08328100  | -0.70856000 | -0.70077700 | B                             | -3.18127400 | -0.76683500 | 0.03925500  |
| B                           | 1.08791200  | -1.65128400 | 0.67006000  | B                             | -4.74334100 | 0.01670400  | 0.04985700  |
| B                           | 2.48059800  | -0.81172000 | 0.38607600  | B                             | -4.54292200 | 1.61807500  | -0.00045200 |
| B                           | 2.53612700  | -2.50905900 | 0.11419000  | B                             | -4.60702900 | -1.58028000 | -0.00454500 |
| B                           | 1.15032400  | -3.33220100 | -0.10563200 | B                             | -1.84607200 | -3.33990000 | -0.09549200 |
| B                           | -0.32569600 | -2.45417300 | 0.33824000  | B                             | -0.40336200 | -4.06822200 | -0.07751900 |
| B                           | -0.27196500 | -3.92887100 | -0.43743200 | B                             | -3.28415000 | -2.50579100 | -0.06365200 |
| B                           | -4.66323800 | -0.04943800 | -0.47779800 | B                             | 1.06391700  | 0.00443900  | -0.37457700 |
| B                           | -4.44062700 | -1.60167000 | -0.62479900 | B                             | -3.25041500 | 2.55332100  | 0.11051200  |
| B                           | -3.18211400 | -0.81603900 | 0.13473800  | B                             | -1.78605600 | -1.58874900 | -0.32472600 |
| B                           | -1.70983200 | -3.26874200 | -0.33194500 | B                             | 3.92973100  | -1.77686100 | 0.09390500  |
| B                           | -3.21884500 | 0.82819500  | 0.46431400  | B                             | 3.84281900  | 0.02045500  | 0.27243800  |
| B                           | -3.14988900 | -2.48699700 | -0.39524800 | B                             | 3.98447000  | 1.76272800  | 0.04873400  |
| B                           | -1.82788500 | 3.30947500  | -0.16130400 | B                             | -0.37219800 | -2.43101400 | -0.05062300 |
| B                           | 3.89019400  | -1.69250600 | -0.19401400 | B                             | 5.26306800  | 0.78153800  | 0.04528600  |
| B                           | -1.70027600 | -1.56107600 | 0.03575700  | B                             | 5.23963900  | -0.79210100 | 0.01220100  |
| B                           | 1.00951500  | 3.38784600  | -0.22086000 | B                             | -1.75016700 | 0.04122400  | 0.15953900  |

**Table S3.** Continued.

| $C_2 B_{32}^-$ (VI) |             |             |             | $C_i B_{32}^-$ (VIII) |             |             |             |
|---------------------|-------------|-------------|-------------|-----------------------|-------------|-------------|-------------|
| B                   | -1.43409000 | 0.84049000  | -0.50880100 | B                     | 1.45172400  | -0.83019300 | 0.03414900  |
| B                   | -1.41110900 | 2.50846000  | -0.26531400 | B                     | 2.91321100  | 0.01866900  | 0.00527700  |
| B                   | -0.00183300 | 3.30204600  | 0.00455300  | B                     | 2.90673400  | 1.67091300  | 0.00703500  |
| B                   | 1.39041400  | 2.34138100  | 0.08283900  | B                     | 1.38117400  | 2.41368800  | 0.09883800  |
| B                   | 1.45662700  | 0.85522000  | -0.77022900 | B                     | 0.00343000  | 1.59038800  | -0.48456400 |
| B                   | 2.81516400  | 3.30046500  | 0.39453400  | B                     | 1.49482400  | 4.15583900  | 0.07033300  |
| B                   | -0.02295900 | -1.67072400 | -0.67198900 | B                     | -1.44355800 | -0.78855300 | 0.37332600  |
| B                   | 2.86702700  | -0.08329500 | -0.44903200 | B                     | -1.49612000 | 2.40400400  | -0.39086200 |
| B                   | -2.86702700 | 0.08329500  | -0.44903200 | B                     | 1.49612000  | -2.40400400 | 0.39086200  |
| B                   | 1.39041400  | 3.97693000  | 0.32274500  | B                     | 2.79729000  | 3.25354700  | 0.06762400  |
| B                   | 2.86397800  | 1.67848200  | -0.31625900 | B                     | 0.03884700  | 3.27329200  | -0.38613900 |
| B                   | -1.45662700 | -0.85522000 | -0.77022900 | B                     | -0.00343000 | -1.59038800 | 0.48456400  |
| B                   | -2.84406200 | 1.74334500  | -0.21615600 | B                     | 2.95354900  | -1.61793700 | 0.08571700  |
| B                   | 1.43409000  | -0.84049000 | -0.50880100 | B                     | -1.45172400 | 0.83019300  | -0.03414900 |
| B                   | -4.25155100 | 0.99920100  | 0.18421700  | B                     | 2.99583400  | -3.26656400 | 0.01621800  |
| B                   | 4.21891500  | 2.45577500  | 0.52180000  | B                     | 0.05107600  | 4.95851800  | 0.10809200  |
| B                   | 4.16006100  | 0.75255500  | 0.20814100  | B                     | -1.41107300 | 4.03859700  | -0.05905800 |
| B                   | 5.47559400  | 1.48408100  | 0.81486000  | B                     | -1.42350400 | 5.62466500  | 0.25730000  |
| B                   | 5.48017800  | -0.07860700 | 0.66409000  | B                     | -2.79121100 | 4.85249400  | 0.19745900  |
| B                   | 2.84406200  | -1.74334500 | -0.21615600 | B                     | -2.95354900 | 1.61793700  | -0.08571700 |
| B                   | 1.41110900  | -2.50846000 | -0.26531400 | B                     | -2.91321100 | -0.01866900 | -0.00527700 |
| B                   | -1.39041400 | -2.34138100 | 0.08283900  | B                     | -1.38117400 | -2.41368800 | -0.09883800 |
| B                   | -1.39041400 | -3.97693000 | 0.32274500  | B                     | -2.79729000 | -3.25354700 | -0.06762400 |
| B                   | -2.86397800 | -1.67848200 | -0.31625900 | B                     | -0.03884700 | -3.27329200 | 0.38613900  |
| B                   | -2.81516400 | -3.30046500 | 0.39453400  | B                     | -1.49482400 | -4.15583900 | -0.07033300 |
| B                   | -4.21891500 | -2.45577500 | 0.52180000  | B                     | -0.05107600 | -4.95851800 | -0.10809200 |
| B                   | -5.48017800 | 0.07860700  | 0.66409000  | B                     | 2.79121100  | -4.85249400 | -0.19745900 |
| B                   | -5.47559400 | -1.48408100 | 0.81486000  | B                     | 1.42350400  | -5.62466500 | -0.25730000 |
| B                   | 4.25155100  | -0.99920100 | 0.18421700  | B                     | -2.99583400 | 3.26656400  | -0.01621800 |
| B                   | 0.00183300  | -3.30204600 | 0.00455300  | B                     | -2.90673400 | -1.67091300 | -0.00703500 |
| B                   | -4.16006100 | -0.75255500 | 0.20814100  | B                     | 1.41107300  | -4.03859700 | 0.05905800  |
| B                   | 0.02295900  | 1.67072400  | -0.67198900 | B                     | 1.44355800  | 0.78855300  | -0.37332600 |

**Table S3.** Continued.

| $C_1 B_{32}^-$ (TS2) |             |             |             |
|----------------------|-------------|-------------|-------------|
| B                    | -1.10775400 | 1.24871600  | -0.39121800 |
| B                    | -0.55433200 | 2.83442400  | -0.19290300 |
| B                    | 1.06782200  | 3.17856500  | -0.03936000 |
| B                    | 2.15470300  | 1.91417500  | -0.35991400 |
| B                    | 1.60058400  | 0.31837000  | -0.42975600 |
| B                    | 3.76877100  | 2.29260800  | 0.22890500  |
| B                    | -0.54641700 | -1.59843800 | -0.68569300 |
| B                    | 2.63705400  | -0.96846400 | -0.12535000 |
| B                    | -2.71208200 | 0.99002900  | -0.45133800 |
| B                    | 2.61718000  | 3.38032600  | 0.21919200  |
| B                    | 3.19733300  | 0.66278200  | -0.09570700 |
| B                    | -1.64080100 | -0.33940100 | -0.72933900 |
| B                    | -2.16408100 | 2.55117200  | -0.12624300 |
| B                    | 1.10688600  | -1.28964500 | -0.56434000 |
| B                    | -3.74628900 | 2.27774100  | 0.20286400  |
| B                    | 4.83889500  | 1.02393700  | 0.35238100  |
| B                    | 4.24678400  | -0.59603400 | 0.10404800  |
| B                    | 5.73296100  | -0.29652700 | 0.66995100  |
| B                    | 5.22568500  | -1.78835300 | 0.60869900  |
| B                    | 2.14756000  | -2.56579900 | -0.08866000 |
| B                    | 0.53927100  | -2.83062000 | -0.18079300 |
| B                    | -2.08009700 | -1.81280100 | 0.00953300  |
| B                    | -2.60795100 | -3.36375600 | 0.21057900  |
| B                    | -3.25491800 | -0.68611300 | -0.35123700 |
| B                    | -3.74318800 | -2.26408100 | 0.28214900  |
| B                    | -4.79724700 | -1.01792000 | 0.45771100  |
| B                    | -5.20720900 | 1.77810700  | 0.66105600  |
| B                    | -5.68754700 | 0.29190300  | 0.77985600  |
| B                    | 3.74489900  | -2.30109700 | 0.22793600  |
| B                    | -1.06491900 | -3.16148100 | -0.06285800 |
| B                    | -4.22199600 | 0.58899300  | 0.14928000  |
| B                    | 0.51043900  | 1.54868200  | -0.28942900 |
